# Supplementary material for: Diphlorethohydroxycarmalol Derived from Ishige okamurae Improves Behavioral and Physiological Responses of Muscle Atrophy Induced by Dexamethasone in an In-Vivo Model
Source: MDPI journal article supplement (doi:10.3390/pharmaceutics14040719), 2022-03-27
Supplement: s1 [file s1]

# Supplementary Materials: Diphlorethohydroxycarmalol Derived from *Ishige okamurae* Improves Behavioral and Physiological Responses of Muscle Atrophy Induced by Dexamethasone in an In-Vivo Model

Bomi Ryu, Seyeon Oh, Hye-Won Yang, Batsukh Sosorburam, Dong-Min Chung, Minyoung Seo, Shin Jae Park, Kyunghye Byun and You-Jin Jeon

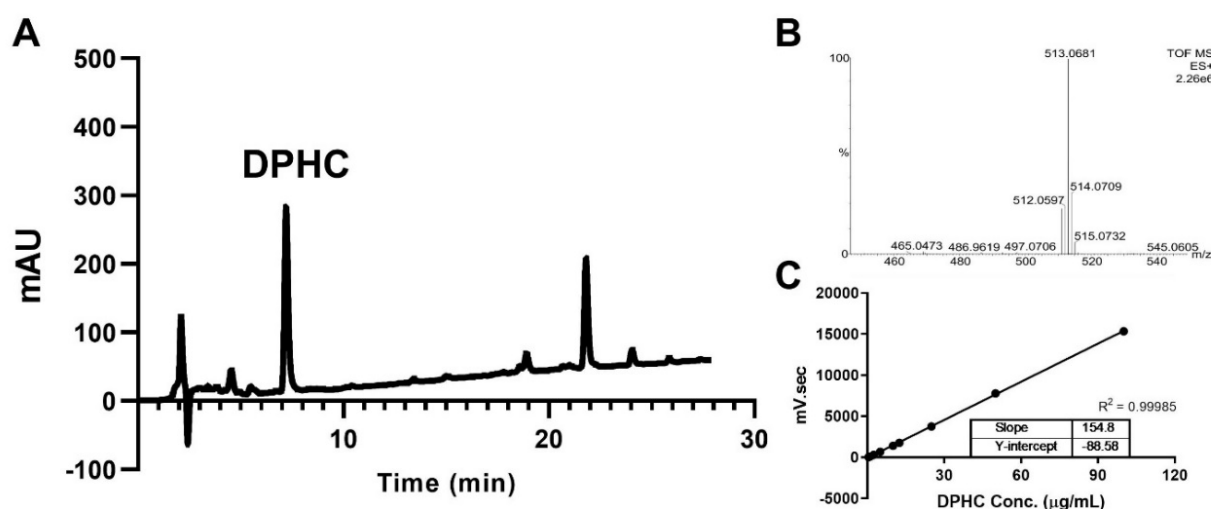

**Figure S1.** HPLC (A) and MS/MS (B) chromatogram data of DPHC in IO and standard curve data for quantification of DPHC (C).

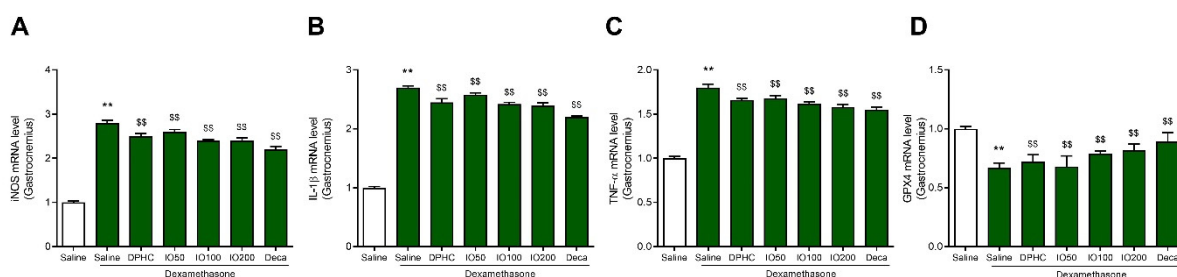

**Figure S2.** Levels of mRNA related to oxidative stress in gastrocnemius muscle of DEX-treated mice displaying muscle atrophy. The panels display results for iNOS (A), IL-1 $\beta$  (B), TNF- $\alpha$  (C), and GPX4 (D). Each group was examined in  $n = 3$  mice. All values are expressed as the mean  $\pm$  standard error. Significant differences are indicated as \*\*  $p < 0.01$  compared with control or \$  $p < 0.01$  compared with DEX-saline (Mann–Whitney U test).

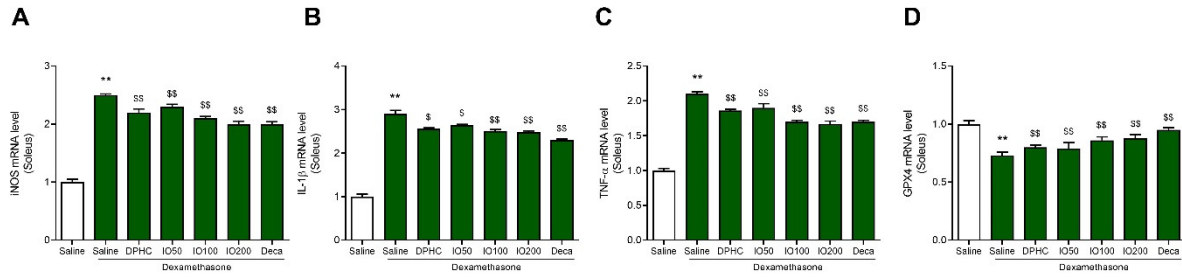

**Figure S3.** Levels of mRNA related to oxidative stress in soleus muscle of muscle DEX-treated mice displaying atrophy. The panels display results for iNOS (**A**), iL-1 $\beta$  (**B**), TNF- $\alpha$  (**C**), and GPX4 (**D**). Each group was examined in  $n = 3$  mice. All values are expressed as the mean  $\pm$  standard error. Significant differences are indicated as \*\*  $p < 0.01$  compared with control or \$  $p < 0.05$ , \$\$  $p < 0.01$  compared with DEX-saline (Mann-Whitney U test).

**Table S1.** List of primer for qRT-PCR.

| Gene                          |         | Primers                             |
|-------------------------------|---------|-------------------------------------|
| <i>Foxo3a</i>                 | Forward | 5'-ACC TTC GTC TCT GAA CTC CTT G-3' |
|                               | Reverse | 5'-AGT GTG ACA CGG AAG AGA AGG T-3' |
| <i>Atrogin-1</i>              | Forward | 5'-GAC ATT CAG AAC AGC AAA ACC A-3' |
|                               | Reverse | 5'-GCT CCT TCG TAC TTC CTT TGT G-3' |
| <i>MuRF1</i>                  | Forward | 5'-ATC TAG CCT GAT TCC TGA TGG A-3' |
|                               | Reverse | 5'-ACC ACA GGC TTG GTA AAC ATC T-3' |
| <i>PI3k</i>                   | Forward | 5'-AGC TGA GTA CCG AGA GAT CGA C-3' |
|                               | Reverse | 5'-TCA GCC ACA TCA AGT ATT GGT C-3' |
| <i>Akt</i>                    | Forward | 5'-CCT TTA TTG GCT ACA AGG AAC G-3' |
|                               | Reverse | 5'-GTG CCA CTG AGA AGT TGT TGA G-3' |
| <i>TRPV4</i>                  | Forward | 5'-CCCATCCTCAAAGTCTTCAATC -3'       |
|                               | Reverse | 5'- GGTCACAAGAAGGAGAGCAGT-3'        |
| <i>A1R</i>                    | Forward | 5'-GAAGATTGGAACGACCACTTC -3'        |
|                               | Reverse | 5'-AGTCATCAGCTTCTCCTCTGG -3'        |
| <i>Myostatin</i>              | Forward | 5'- TTTACCTGTTCATGCTGATTGC-3'       |
|                               | Reverse | 5'- CATTACACAGCCCCTCTTTTTC-3'       |
| <i>SIRT1</i>                  | Forward | 5'-TGTGTGGAAGAAAAACCACAAG -3'       |
|                               | Reverse | 5'- ACCAACAGCCTTAAAATCTGGA -3'      |
| <i>TGF-<math>\beta</math></i> | Forward | 5'-TGA CGT CAC TGG AGT TGT AC-3'    |
|                               | Reverse | 5' GGT TCA TGT CAT GGA TGG TG-3'    |
